# Supplementary material for: Increased abundance of Firmicutes and depletion of Bacteroidota predicts poor outcome in chronic lymphocytic leukemia
Source: Oncol Lett. 2024 Sep 17;28(5):552. doi: 10.3892/ol.2024.14685 (PMC11425030; doi:10.3892/ol.2024.14685)
Supplement: Supporting Data [file Supplementary_Data3.xlsx]

## Sheet: oral
Table SIII. Relative abundance comparisons at the phylum and family level in oral microbiota of CLL patients with respect to the selected prognostic and predictive features.
			Phylum										SCFA-producing bacterial family
			Actinobacteriota		Bacteroidetes		Firmicutes		Fusobacteriota		Proteobacteria		Fusobacteriaceae		Lachnospiraceae		Prevotellaceae		Veillonellaceae
Patients' characteristics		No. of patients	Median relative abundance (%)	P-value	Median relative abundance (%)	P-value	Median relative abundance (%)	P-value	Median relative abundance (%)	P-value	Median relative abundance (%)	P-value	Median relative abundance (%)	P-value	Median relative abundance (%)	P-value	Median relative abundance (%)	P-value	Median relative abundance (%)	P-value
Sex	Female vs male	28 vs 41	9.94 vs 6.24	0.029	3.95 vs 25.31	0.092	40.48 vs 40.53	0.86	6.02 vs 7.23	0.62	7.72 vs 9.58	0.77	1.88 vs 3.28	0.41	3.77 vs 4.92	0.071	2.18 vs 17.77	0.16	9.59 vs 10.95	0.77
Age	≤65 vs >65	29 vs 40	6.63 vs 7.97	0.52	28.15 vs 10.43	0.011	41.21 vs 39.49	0.95	5.19 vs 6.64	0.5	4.13 vs 11.12	0.046	2.44 vs 3.22	0.79	5.28 vs 3.47	0.088	23.22 vs 4.20	0.018	10.99 vs 9.54	0.34
Binet stage	A vs B	22 vs 22	5.83 vs 11.42	0.041	26.06 vs 12.83	0.06	36.29 vs 41.06	0.57	4.25 vs 7.93	0.047	7.85 vs 8.07	0.68	1.69 vs 4.81	0.035	2.31 vs 5.86	0.022	21.77 vs 4.16	0.022	13.46 vs 11.83	0.72
	A vs C	22 vs 22	5.83 vs 6.99	0.62	26.06 vs 8.99	0.089	36.29 vs 41.54	0.52	4.25 vs 7.80	0.11	7.85 vs 8.32	0.62	1.69 vs 3.33	0.11	2.31 vs 3.98	0.35	21.77 vs 4.63	0.07	13.46 vs 7.18	0.16
	B vs C	22 vs 22	11.42 vs 6.99	0.2	12.83 vs 8.99	0.65	41.06 vs 41.54	0.84	7.93 vs 7.80	0.47	8.07 vs 8.32	1	4.81 vs 3.33	0.45	5.86 vs 3.98	0.19	4.16 vs 4.63	0.48	11.83 vs 7.18	0.13
CD38 expression	positive vs negative	30 vs 38	9.94 vs 5.97	0.061	8.99 vs 23.69	0.11	40.34 vs 40.14	0.38	7.16 vs 5.92	0.43	7.85 vs 9.22	0.85	3.22 vs 2.48	0.74	4.82 vs 3.78	0.4	3.01 vs 17.06	0.21	9.59 vs 10.97	0.92
ZAP-70 expression	positive vs negative	15 vs 53	8.12 vs 6.85	0.36	14.22 vs 17.00	0.68	36.60 vs 40.68	0.72	6.50 vs 6.78	0.61	7.63 vs 9.03	0.51	1.96 vs 3.15	0.26	2.28 vs 4.82	0.062	7.23 vs 15.29	0.98	6.72 vs 10.99	0.49
IGHV mutation status	mutated-CLL vs unmutated-CLL	33 vs 28	6.00 vs 8.63	0.54	21.67 vs 4.34	0.077	40.68 vs 39.49	0.9	6.47 vs 5.58	0.98	9.43 vs 9.03	0.2	1.95 vs 3.07	0.86	3.72 vs 3.79	0.58	16.72 vs 0.99	0.087	12.96 vs 6.98	0.053
Stereotyped subsets	stereotyped subsets vs other	23 vs 35	11.78 vs 6.63	0.35	8.66 vs 17.00	0.3	39.23 vs 41.21	0.17	5.56 vs 6.50	0.92	12.58 vs 4.17	0.016	3.54 vs 1.95	0.38	3.68 vs 3.78	0.73	1.76 vs 10.53	0.32	8.51 vs 12.74	0.17
Stereotyped subsets	high risk vs other stereotyped subsets	5 vs 18	8.73 vs 12.15	0.75	16.34 vs 8.26	0.86	41.45 vs 37.95	0.49	7.09 vs 5.15	0.22	12.58 vs 13.87	1	3.54 vs 3.42	0.74	5.75 vs 2.97	0.067	15.29 vs 1.72	0.74	12.24 vs 8.25	0.23
TP53 mutation status	mutated vs wild-type	3 vs 63	11.78 vs 7.11	0.85	25.71 vs 14.22	0.98	36.60 vs 41.21	0.5	8.51 vs 6.50	0.3	16.90 vs 8.07	0.24	5.12 vs 2.99	0.17	5.24 vs 4.16	0.6	17.77 vs 6.63	0.93	9.25 vs 10.99	0.71
Cytogenetics	del(17p) vs no del(17p)	2 vs 67	14.23 vs 6.82	0.29	12.91 vs 16.34	0.53	42.22 vs 40.53	0.99	7.80 vs 6.47	0.73	21.87 vs 7.80	0.23	5.06 vs 2.53	0.42	4.02 vs 4.22	0.93	8.88 vs 7.91	0.65	8.56 vs 10.95	0.76
	del(11q) vs no del(11q)	17 vs 52	10.30 vs 6.72	0.45	7.87 vs 19.39	0.31	37.77 vs 42.23	0.27	8.10 vs 5.28	0.071	16.90 vs 6.88	0.019	4.97 vs 1.96	0.069	4.82 vs 4.03	0.31	1.76 vs 15.87	0.14	9.83 vs 10.97	0.97
	isolated del(13q) vs no del(13q)	27 vs 42	5.72 vs 7.72	0.31	26.10 vs 12.48	0.26	39.03 vs 40.60	0.34	5.19 vs 7.51	0.24	9.41 vs 7.65	0.95	1.81 vs 3.40	0.29	4.22 vs 4.19	0.97	17.39 vs 5.34	0.3	8.87 vs 11.18	0.31
	tri12 vs no tri12	8 vs 61	13.92 vs 6.63	0.048	0.53 vs 17.10	0.12	63.62 vs 39.23	0.028	1.27 vs 6.78	0.23	4.33 vs 9.03	0.3	0.31 vs 3.28	0.088	2.21 vs 4.30	0.33	1.56 vs 10.53	0.16	11.45 vs 9.83	0.96
