# Supplementary material for: Increased abundance of Firmicutes and depletion of Bacteroidota predicts poor outcome in chronic lymphocytic leukemia
Source: Oncol Lett. 2024 Sep 17;28(5):552. doi: 10.3892/ol.2024.14685 (PMC11425030; doi:10.3892/ol.2024.14685)
Supplement: Supporting Data [file Supplementary_Data4.xlsx]

## Sheet: stool
Table SIV. Relative abundance comparisons at the phylum and family level in gut microbiota of patients with CLL with respect to the selected prognostic and predictive features.
			Phylum								SCFA-producing bacterial familes
			Firmicutes		Bacteroidota		Proteobacteria		Actinobacteriota		Bacteroidaceae		Lachnospiraceae		Prevotellaceae		Ruminococcaceae
Patient's characteristic		No. of patients	Median relative abundance (%)	P-value	Median relative abundance (%)	P-value	Median relative abundance (%)	P-value	Median relative abundance (%)	P-value	Median relative abundance (%)	P-value	Median relative abundance (%)	P-value	Median relative abundance (%)	P-value	Median relative abundance (%)	P-value
Sex	female vs male	27 vs 48	60.03 vs 53.14	0.2	26.62 vs 34.77	0.15	6.17 vs 5.91	0.75	0.75 vs 0.75	0.63	6.99 vs 14.41	0.37	17.92 vs 16.53	0.18	0.38 vs 1.01	0.62	14.84 vs 14.69	0.51
Age	≤65 vs >65	33 vs 42	54.18 vs 59.30	0.62	31.40 vs 31.69	0.56	2.65 vs 2.74	1	0.74 vs 0.76	0.89	13.79 vs 12.49	0.12	17.92 vs 17.32	0.44	0.05 vs 1.41	0.14	13.31 vs 14.88	0.71
Binet stage	A vs B	27 vs 22	43.10 vs 58.06	0.047	40.80 vs 27.40	0.0069	2.24 vs 2.47	0.56	0.56 vs 1.69	0.098	16.28 vs 11.90	0.051	16.42 vs 17.49	0.23	2.13 vs 0.00	0.02	13.11 vs 15.20	0.14
	A vs C	27 vs 23	43.10 vs 63.71	0.067	40.80 vs 30.52	0.038	2.24 vs 4.04	0.1	0.56 vs 0.74	1	16.28 vs 3.46	0.022	16.42 vs 16.49	0.82	2.13 vs 0.68	0.39	13.11 vs 14.46	0.59
	B vs C	22 vs 23	58.06 vs 63.71	0.92	27.40 vs 30.52	0.49	2.47 vs 4.04	0.76	1.69 vs 0.74	0.21	11.90 vs 3.46	0.66	17.49 vs 16.49	0.28	0.00 vs 0.68	0.13	15.20 vs 14.46	0.23
CD38 expression	positive vs negative	31 vs 41	64.40 vs 46.97	0.045	30.15 vs 42.76	0.069	2.72 vs 2.48	0.33	0.74 vs 0.75	0.66	7.89 vs 18.90	0.045	17.30 vs 17.45	0.66	0.23 vs 1.29	0.95	14.86 vs 13.11	0.49
ZAP-70 expression	positive vs negative	15 vs 57	54.18 vs 59.14	0.47	37.81 vs 30.52	0.49	2.65 vs 2.48	0.61	0.65 vs 0.75	0.79	15.70 vs 10.22	0.69	15.01 vs 17.45	0.35	4.17 vs 0.16	0.075	14.78 vs 14.78	1
IGHV mutation status	mutated-CLL vs unmutated-CLL	28 vs 36	55.92 vs 64.05	0.13	35.84 vs 30.34	0.079	2.66 vs 3.54	0.24	0.62 vs 0.70	0.97	15.99 vs 6.99	0.089	19.46 vs 14.94	0.42	1.17 vs 0.14	0.67	13.16 vs 14.88	0.3
Stereotyped subsets	stereotyped subsets vs other	23 vs 38	59.47 vs 59.85	0.57	29.59 vs 31.72	0.74	3.77 vs 2.62	0.65	0.57 vs 1.04	0.94	12.29 vs 10.87	0.7	16.80 vs 19.56	0.66	0.06 vs 0.46	0.37	14.78 vs 15.01	0.89
Stereotyped subsets	high risk vs other stereotyped subsets	5 vs 18	71.20 vs 57.96	0.45	13.26 vs 32.14	0.75	2.85 vs 4.10	0.45	0.57 vs 0.57	0.86	5.99 vs 14.03	0.8	19.71 vs 15.07	0.13	0.00 vs 0.45	0.16	14.86 vs 13.94	0.4
TP53 mutation status	mutated vs wild-type	5 vs 65	56.17 vs 59.47	1	34.95 vs 31.13	0.82	6.28 vs 2.72	0.77	0.77 vs 0.74	1	4.59 vs 12.29	0.77	15.24 vs 17.63	0.68	1.98 vs 0.23	0.37	11.43 vs 14.84	0.47
Cytogenetics	del(17p) vs no del(17p)	6 vs 68	58.90 vs 58.06	0.47	33.91 vs 31.13	0.87	2.18 vs 2.74	0.82	0.71 vs 0.76	0.79	5.34 vs 13.70	0.64	13.64 vs 17.54	0.8	9.13 vs 0.30	0.16	13.97 vs 14.78	0.93
	del(11q) vs no del(11q)	16 vs 58	60.91 vs 57.23	0.32	28.57 vs 31.83	0.35	2.47 vs 2.74	0.89	0.88 vs 0.75	1	4.54 vs 15.36	0.095	15.14 vs 17.78	0.59	0.06 vs 1.01	0.72	15.12 vs 13.98	0.2
	isolated del(13q) vs no del(13q)	28 vs 46	52.96 vs 59.40	0.34	34.25 vs 30.83	0.43	2.66 vs 2.75	0.93	1.03 vs 0.75	0.6	22.68 vs 8.98	0.27	20.11 vs 16.49	0.26	1.01 vs 0.53	0.51	11.65 vs 15.01	0.04
	tri12 vs no tri12	7 vs 67	59.67 vs 56.45	0.67	25.25 vs 33.00	0.4	1.00 vs 2.72	0.81	3.49 vs 2.66	0.61	18.24 vs 12.29	0.89	17.63 vs 17.35	0.55	0.16 vs 0.70	0.9	16.10 vs 13.31	0.22
